## Function and clinical relevance of RHAMM isoforms in pancreatic tumor progression

Soyoung Choi<sup>1,a</sup>, Dunrui Wang<sup>2</sup>, Xiang Chen<sup>1</sup>, Laura H. Tang<sup>3</sup>, Akanksha Verma<sup>4</sup>, Zhengming Chen<sup>5</sup>, Bu Jung Kim<sup>1,b</sup>, Leigh Selesner<sup>1,d</sup>, Kenneth Robzyk<sup>3</sup>, George Zhang<sup>1</sup>, Sharon Pang<sup>1,c</sup>, Teng Han<sup>6</sup>, Chang S. Chan<sup>7</sup>, Thomas J. Fahey III<sup>8</sup>, Olivier Elemento<sup>4</sup>, Yi-Chieh Nancy Du<sup>1,6,\*</sup>

<sup>1</sup>Department of Pathology and Laboratory Medicine, Weill Cornell Medicine, New York, NY 10065, <sup>2</sup>Laboratory of Cellular Oncology, National Cancer Institute, National Institutes of Health, Bethesda, MD 20892, <sup>3</sup>Department of Pathology, Memorial Sloan Kettering Cancer Center, New York, NY 10065, <sup>4</sup>Caryl and Israel Englander Institute for Precision Medicine, Institute for Computational Biomedicine, Department of Physiology and Biophysics, Weill Cornell Medicine, New York, NY 10065, <sup>5</sup>Division of Biostatistics and Epidemiology, Department of Healthcare Policy and Research, Weill Cornell Medicine, New York, NY 10065, <sup>6</sup>Weill Cornell Graduate School of Medical Sciences, Cornell University, New York, NY 10065, <sup>7</sup>Rutgers Cancer Institute of New Jersey, New Brunswick, NJ 08903, <sup>8</sup>Department of Surgery, Weill Cornell Medicine, New York, NY 10065

**\*Correspondence:** Yi-Chieh Nancy Du, Department of Pathology and Laboratory Medicine, Box 69, Weill Cornell Medicine, New York, NY 10065. Phone: 212-746-7312; E-mail: nad2012@med.cornell.edu

## Abstract

The receptor for hyaluronic acid-mediated motility (RHAMM) is upregulated in various cancers. We previously screened genes upregulated in human hepatocellular carcinomas for their metastatic function in a mouse model of pancreatic neuroendocrine tumor (PNET) and identified that human *RHAMM<sup>B</sup>* promoted liver metastasis. It was unknown whether *RHAMM<sup>B</sup>* is upregulated in pancreatic cancer or contributes to its progression. In this study, we found that RHAMM protein was frequently upregulated in human PNETs. We investigated alternative splicing isoforms, *RHAMM<sup>A</sup>* and *RHAMM<sup>B</sup>*, by RNA-Seq analysis of primary PNETs and liver metastases. *RHAMM<sup>B</sup>*, but not *RHAMM<sup>A</sup>*, was significantly upregulated in liver metastases. *RHAMM<sup>B</sup>* was crucial for *in vivo* metastatic capacity of mouse and human PNETs. *RHAMM<sup>A</sup>*, carrying an extra 15-amino acid-stretch, did not promote metastasis in spontaneous and experimental metastasis mouse models. Moreover, *RHAMM<sup>B</sup>* was substantially higher than *RHAMM<sup>A</sup>* in pancreatic ductal adenocarcinoma (PDAC). *RHAMM<sup>B</sup>*, but not *RHAMM<sup>A</sup>*, correlated with both higher *EGFR* expression and poorer survival of PDAC patients. Knockdown of EGFR abolished *RHAMM<sup>B</sup>*-driven PNET metastasis. Altogether, our findings suggest a clinically relevant function of *RHAMM<sup>B</sup>*, but not *RHAMM<sup>A</sup>*, in promoting PNET metastasis in part through EGFR signaling. *RHAMM<sup>B</sup>* can thus serve as a prognostic factor for pancreatic cancer.

**Key words:** RHAMM, isoforms, pancreatic cancer, PNETs, PDAC, metastasis

## Main text

Metastasis accounts for 90 percent of cancer deaths. We developed a mouse model of well-defined multistage tumorigenesis: *RIP-Tag*; *RIP-tva* to identify metastatic factors [1]. We identified that the receptor for hyaluronic acid (HA)-mediated motility, isoform B (RHAMM<sup>B</sup>), significantly promotes liver metastasis of pancreatic neuroendocrine tumors (PNET) in *RIP-Tag*; *RIP-tva* mouse models [2]. Expression of RHAMM is restricted in normal adult tissues, but is upregulated in cancers [3, 4]. Increased production of glycosaminoglycan, HA, is correlated with increased migration and invasion in aggressive cancers [5]. CD44 and RHAMM are two major HA receptors. The roles of CD44 isoforms in cancer have been studied extensively, but the functions of RHAMM isoforms in tumorigenesis are less clear. *RHAMM* encodes 18 exons and alternative splicing generates different isoforms. *RHAMM<sup>A</sup>* includes all exons and *RHAMM<sup>B</sup>* lacks exon 4 (Fig. 1A). Here we aimed to determine the clinical relevance of *RHAMM<sup>A</sup>* and *RHAMM<sup>B</sup>* isoforms and their functions in pancreatic cancer.

### **RHAMM<sup>B</sup>, but not RHAMM<sup>A</sup>, is upregulated in human PNET liver metastases**

To investigate RHAMM expression in human PNETs, a tissue microarray consisting of 83 PNETs was immunostained for RHAMM. RHAMM was not detectable in the normal pancreas, while 54 of 83 (65%) PNETs exhibited cytoplasmic staining using an antibody that recognizes common region in RHAMM isoforms (Fig. 1B). Because isoform-specific RHAMM antibodies were not available, we investigated the mRNA levels of *RHAMM<sup>A</sup>* and *RHAMM<sup>B</sup>* by performing RNA-Seq analysis on 27 primary PNETs and 12 liver metastases, using 89 human islets from Gene Expression Omnibus database for comparison. Consistent with our immunohistochemical data, normal islets had very low *RHAMM<sup>A</sup>* and *RHAMM<sup>B</sup>* mRNA (Fig. 1C). *RHAMM<sup>B</sup>* was

significantly higher than *RHAMM<sup>A</sup>* in both primary and metastatic PNETs, suggesting that *RHAMM<sup>B</sup>* was the predominant isoform naturally expressed in PNETs. Although *RHAMM<sup>A</sup>* levels in primary tumors were significantly higher than those in normal islets ( $p = 0.0002$ ), *RHAMM<sup>A</sup>* levels in metastatic tumors were not significantly higher than those in normal islets ( $p = 0.8928$ ). The mRNAs of *RHAMM<sup>A</sup>* and *RHAMM<sup>B</sup>* were readily detectable in additional primary PNETs and metastases by RT-qPCR using isoform-specific primers (Fig. S1A-B).

We compared metastatic potential of *RHAMM<sup>A</sup>* to *RHAMM<sup>B</sup>* in *RIP-Tag; RIP-tva* models of spontaneous metastasis and tail vein assays [1, 2]. In contrast to *RHAMM<sup>B</sup>*, *RHAMM<sup>A</sup>* did not promote spontaneous metastasis (Table S1). Then, we generated N134 cells overexpressing *RHAMM<sup>A</sup>* (N134-*RHAMM<sup>A</sup>*). N134 is a cell line derived from a PNET of *RIP-Tag; RIP-tva* mouse [1]. Although there were more *RHAMM<sup>A</sup>* than *RHAMM<sup>B</sup>* for unknown reasons (Fig. 1D), only one visible tumor was found in 5 immunodeficient NOD/scid-IL2Rgc knockout (NSG) mice receiving N134-*RHAMM<sup>A</sup>* cells after 5 weeks, while all 5 mice receiving N134-*RHAMM<sup>B</sup>* cells developed large liver metastases within 5 weeks (Fig. 1E and Fig. S2A). To detect micrometastases, we performed immunostaining for synaptophysin, a neuroendocrine marker. Mice receiving N134 cells and N134-*RHAMM<sup>A</sup>* cells had an average of 1.8 and 0.6 liver micrometastases, respectively (Fig. S2B). These data suggest that the unique 15-amino acid-stretch, ESQKNDKDLKILEKE, which is present in *RHAMM<sup>A</sup>* but not in *RHAMM<sup>B</sup>*, inhibited the metastatic function of *RHAMM*.

### ***RHAMM<sup>B</sup>* is crucial for the metastatic potential of human PNET cell line BON1-TGL**

BON1 is the most utilized human PNET cell line and was established from a peri-pancreatic



lymph node in a patient with metastatic PNET. We found that BON1 had much higher expression of *RHAMM<sup>B</sup>* than *RHAMM<sup>A</sup>* as determined by RNA-Seq (Fig. 2A). We performed shRNA-mediated knockdown of total *RHAMM* to investigate whether this reduces metastasis of BON1-TGL cells, which carry the thymidine kinase/*green fluorescent protein* /*luciferase* fusion reporter (TGL). Knockdown of *RHAMM* by shRNA was confirmed (Fig. 2B-C). We used an orthotopic model of PNET liver metastases by injecting cells into the spleen of NSG mice [6]. Mice receiving control cells developed an average of 82.5 liver metastases after 3 weeks, while mice receiving BON1-TGL-*shRHAMM* cells developed an average of 17 liver metastases with significantly lowered tumor burden (Fig. 2D-F).

To determine whether even higher *RHAMM<sup>B</sup>* levels would further enhance metastasis of BON1-TGL cells, we generated BON1-TGL cells overexpressing *RHAMM<sup>B</sup>* (Fig. 2G). We injected cells into NSG mice via intracardiac injection. The increased levels of *RHAMM<sup>B</sup>* enhanced metastasis of BON1-TGL in mice throughout the mouse body as visualized by bioluminescence imaging and signals from multiple organs were higher in mice receiving BON1-TGL-*RHAMM<sup>B</sup>* than those in mice receiving BON1-TGL overexpressing a control vector (Fig. 2H). Notably, we observed macrometastases at the adrenal glands of mice receiving BON1-TGL-*RHAMM<sup>B</sup>*, but not in control mice (Fig. 2I). Taken together, *RHAMM<sup>B</sup>* is crucial for PNET metastasis.

### ***RHAMM<sup>B</sup>* is upregulated in human pancreatic ductal adenocarcinoma (PDAC) and correlates with poor survival**

PDAC is the most common pancreatic cancer type. It was shown that total *RHAMM* is upregulated in primary PDAC by RT-qPCR of 14 matched tumors and adjacent normal tissues

[7]. To compare *RHAMM<sup>A</sup>* and *RHAMM<sup>B</sup>* levels in PDAC, we analyzed publicly available The Cancer Genome Atlas (TCGA) datasets. Both *RHAMM<sup>A</sup>* and *RHAMM<sup>B</sup>* were expressed at significantly higher levels in PDAC than in normal pancreatic tissues, and *RHAMM<sup>B</sup>* was substantially higher than *RHAMM<sup>A</sup>* (Fig. 3A). Survival analysis showed that high *RHAMM* levels were correlated with a worse outcome (Fig. 3B). Furthermore, patients with high *RHAMM<sup>B</sup>* had inferior survival compared to those with high *RHAMM<sup>A</sup>* (Fig. 3C-D), suggesting that *RHAMM<sup>B</sup>*, but not *RHAMM<sup>A</sup>*, is a prognostic factor for survival of PDAC patients. Due to limited information available, we could not perform survival analysis for PNETs.

### **EGFR signaling is required for *RHAMM<sup>B</sup>*-induced metastasis**

EGFR activation is associated with worse survival in many malignancies. Analysis of TCGA PDAC dataset showed a good correlation between *EGFR* and *RHAMM<sup>B</sup>* expression, but not between *EGFR* and *RHAMM<sup>A</sup>* expression (Fig. S3A-B). We previously showed that EGFR signaling is activated in N134-*RHAMM<sup>B</sup>* cells and an EGFR inhibitor, gefitinib, induces apoptosis of N134-*RHAMM<sup>B</sup>* cells [2]. These findings led us to hypothesize that enhanced EGFR signaling involves *RHAMM<sup>B</sup>*-induced metastasis. To test this hypothesis, we used two different shRNAs targeting mouse *EGFR* (S7 and S9) as well as a control shRNA targeting *LacZ* (*shLacZ*). *shEGFR*(S7 and S9) decreased the levels of both EGFR and p-ERK1/2, a downstream target of EGFR signaling, with S7 exhibiting a better knockdown efficiency than S9 (Fig. 3E).

In tail vein metastasis assays, mice receiving N134-*RHAMM<sup>B</sup>*-*shLacZ* became lethargic, showing a mean of 29.8 liver macrometastases per mouse within 5 weeks, but mice injected with N134-*RHAMM<sup>B</sup>*-*shEGFR*(S7) and N134-*RHAMM<sup>B</sup>*-*shEGFR*(S9) cells did not develop

metastases 5 weeks post-injection (Fig. 3F). An additional cohort of mice injected with N134-RHAMM<sup>B</sup>-*shEGFR*(S7) still did not develop metastases 7 weeks post-injection, and only a mean of 0.5 liver macrometastases appeared in mice injected with N134-RHAMM<sup>B</sup>-*shEGFR*(S9) at this time point (Fig. 3F).

We investigated whether a constitutively active form of EGFR, EGFR\*, is sufficient to recapitulate RHAMM<sup>B</sup> activity in metastasis. Five of the 8 *RIP-Tag; RIP-tva* mice receiving RCASBP-EGFR\* developed pancreatic lymph node metastases (62.5%) and 2 developed liver metastases (25%) (Table S1). We generated N134 cells overexpressing EGFR\* (N134-EGFR\*) for experimental metastasis (Fig. 3G). While no metastasis was found in mice receiving control N134-Luciferase after 6 weeks, an average of 6 liver macrometastases was detected in mice receiving N134-EGFR\* (Fig. 3H). Although EGFR\* promotes liver metastasis of PNETs in both spontaneous and experimental metastasis mouse models, the degree of metastasis is less than that of RHAMM<sup>B</sup> (Table S1 and Fig. 3H). Therefore, these EGFR knockdown and EGFR\* overexpression data suggest that activation of EGFR contributes to RHAMM<sup>B</sup>-induced PNET metastasis, but EGFR\* cannot fully recapitulate the metastatic phenotype of RHAMM<sup>B</sup>. Further studies are required to identify signals other than EGFR provided by RHAMM<sup>B</sup> and to understand whether endogenous levels of RHAMM<sup>A</sup> activate EGFR signaling.

## Conclusion

We provide evidence that upregulation of RHAMM<sup>B</sup> is a valuable prognostic marker for pancreatic cancer. We demonstrated that only the shorter isoform RHAMM<sup>B</sup>, but not RHAMM<sup>A</sup> with 15 extra amino acids encoded by exon 4, is significantly upregulated in PNET and PDAC.

RHAMM<sup>B</sup>, but not RHAMM<sup>A</sup>, promotes metastasis in spontaneous and experimental metastasis mouse models of PNET. EGFR signaling is required for RHAMM<sup>B</sup>-induced liver metastasis, but is not sufficient to promote PNET metastasis. *RHAMM<sup>B</sup>*, but not *RHAMM<sup>A</sup>*, is correlated with inferior survival in PDAC patients.

## Methods and Materials

### Bioinformatics and Statistical Analysis for *RHAMM* variants from RNA-Seq data

Total RNAs from 27 primary human PanNETs, 12 metastatic human PanNETs, and human BON1 cell line [8] were isolated with RNeasy Plus Universal Kits (Qiagen Cat no. 73404, Germantown, MD) according to the manufacturer's protocol. Library preparation and RNA sequencing with paired-end 75 bp reads were performed according to protocols at the Genomics Resources Core Facility, Memorial Sloan Kettering Cancer Center, and Weill Cornell Medicine. A RNA-Seq dataset of 89 human pancreatic islets was obtained from publicly available database Gene Expression Omnibus (GEO accession GSE50398, <http://www.ncbi.nlm.nih.gov/geo/query/acc.cgi?acc=GSE50398>) [9-11], and was converted to fastq file from SRA format using SRA Toolkit (v 2.4.4). All samples analyzed were aligned to hg19 reference genome using STAR (v 2.4) aligner. Aligned samples were then quantified to obtain gene expression in terms of FPKM (Fragments per Kilobase of Transcripts per Million Reads) against a UCSC hg19 annotation Gene Transfer Format containing coordinates for all genes, including specific RHAMM isoforms of interest using CuffLinks (v 2.2.1). FPKM values were extracted from isoform specific quantification output obtained from CuffLinks for each sample, with focus on isoform A (NM\_012484) and isoform B of *RHAMM* (NM\_012485). Log-transformed FPKM values ( $\log_2$  [FPKM+1]) were used for further analysis to compare the

expression levels across tissue types (Normal, Primary and Liver metastasis) and *RHAMM* isoforms (*RHAMM<sup>A</sup>* and *RHAMM<sup>B</sup>*) using two-way ANOVA, followed by pairwise comparisons with Tukey's post-hoc test for multiple comparison adjustment. All analyses were performed in open-source data analysis software R (v 2.14.1) or SAS 9.4 (SAS Institute, Cary, NC).

Bioinformatics and statistical analyses were conducted on the publically available gene expression dataset from The Cancer Genome Atlas (TCGA; <http://cancergenome.nih.gov/>). TCGA normalized expression values were created by Illumina RNA-Seq version 2 RNA sequencing data (level 3). Downloaded data was analyzed using R or statistical software Prism (version 6.0f) for statistical computation and Kaplan-Meier survival analysis with log-rank test. Two-tailed Mann-Whitney U test was used to compare differences between two groups selected. P values < 0.05 were considered as statistically significant.

### **Quantitative real-time reverse transcription PCR (RT-qPCR)**

Messenger RNA (mRNA) was isolated from human PanNET specimens or cells grown on 6-cm or 10-cm plates using RNeasy mini kit (Qiagen) containing gDNA eliminator spin columns. The cDNA was generated using SuperScript III First-strand synthesis system with random hexamers (Invitrogen), and power SYBR green (Invitrogen)-based qPCR was performed with 3 internal control genes and the comparative  $C_T$  method ( $\Delta\Delta C_T$ ).

The sequences of the primers used are *RHAMM<sup>A</sup>* (forward: located within exon 3, 5'-TGACAAAGATACTACCT TGCCTGCT-3', reverse: located at the junction of exon 3 and 4, 5'-TCATTCTTTTGAGATTCCTTTGATTC-3'); *RHAMM<sup>B</sup>* (forward: located at the junction of exon 3 and 5, 5'-AAAGTTAAGTCTTCG GAATCAAAGATT-3', reverse: located within exon

5, 5'-GCATTATTTGCA GAGAGAGATGT-3'), and internal control genes: human *HMBS* (forward: 5'-CCATCATCCT GGCAACAGCT-3', reverse: 5'-GCATTCCTCAGGGTGCAGG-3'); human *EEF1A* (forward: 5'-CAATGTGGGCTTCAA TGTCAA-3', reverse: 5'-CATAGCCGGCGCTTATTTG-3'); human *MRPL19* (forward: 5'-GGGATTTGCATTCAGAGATCAGG-3', reverse: 5'-CTCCTGGACCCGAGGATTATAA-3').

### **Tissue preparation, immunohistochemistry, and scoring of protein expression**

Retrospective and prospective review of PanNETs was performed using the pathology files and pancreatic cancer database at the authors' institutions with Institutional Review Board (IRB) approval. Construction of TMA of human PanNETs was described previously [12]. Mouse tissues were fixed in 10% buffered formalin overnight at room temperature. Fixed tissues were processed and cut into 5 µm sections at HistoServ. Formalin-fixed/paraffin-embedded sections were deparaffinized and rehydrated by passage through a graded xylene/ethanol series before staining. Immunohistochemistry was examined by VECTASTAIN Elite ABC Kits (Vector Laboratories, Inc., Burlingame, CA) following manufacturer's instructions. The primary antibodies used were rabbit anti-RHAMM (1:1,000, Y800 [2], 1:100), rabbit anti-synaptophysin (1:100, Vector Laboratories, VP-S284 or 1:100, Lab Vision/Neomarkers, Fremont, CA, RM-9111), and GFP (1:300, Invitrogen, Carlsbad, CA, A11122). RHAMM expression for each tumor was given a score of 0 if no staining was present, and a score of 1 if moderate to strong staining was present.

### **Cloning of RCASBP and retroviral vectors**

RCASBP is a replication-competent avian leucosis virus with a splice acceptor and the Bryan-RSV pol gene. RCASBP-*RHAMM<sup>B</sup>* [2] and RCASBP-*EGFR\** [13] have been described. RCASBP-*RHAMM<sup>A</sup>* was generated using QuikChange Lightning Site-Directed Mutagenesis Kit (Agilent Technology, Santa Clara, CA) to add exon 4 (forward primer: 5'-agttaagtcttcggaatcaaaggaatctcaaagaatgataaa gatttgaagatattagagaaagagattcgtgttctctacaggaac-3', reverse primer: 5'-gttctctgtagaagaacacgaatctcttctctaataatcttcaaatctttatcattcttttgagattcctttgattccgaagacttaact-3') from RCASBP-*RHAMM<sup>B</sup>*. The presence of exon 4 in RCASBP-*RHAMM<sup>A</sup>* was confirmed by DNA sequencing.

### **The shRNA knockdown**

Hairpin sequences targeting *EGFR* are S7: CCAAGCCAAATGGCATATTTA and S9: GCTTTCGAGAACCTAGAAATA. Hairpin sequence targeting *LacZ* is TCGTATTACAACGTCGTGACT. Hairpin sequence targeting *RHAMM* is sh1: GCCAACTCAAATCGGAAGTAT (Sigma, Clone ID: NM\_012484.2-2128s21c1). Lentiviruses harboring shRNA were generated using 293T cells as described previously (<http://www.broadinstitute.org/rnai/public/resources/protocols>).

### **Cell culture and Western blot**

Generation of N134 and BON1-TGL cell lines has been described [1, 14]. Human pancreatic neuroendocrine tumor cell line, BON1, was provided by Chris Harris [8, 12]. DF1, N134, and BON1-TGL were cultured in Dulbecco's modified Eagle's medium (DMEM) supplemented with 10% fetal bovine serum (FBS), 6 mM L-glutamine, and penicillin/streptomycin. The BON1-TGL cell line was transfected with pBABE-*RHAMM<sup>B</sup>* with lipofectamine 2000 (Invitrogen) to

generate BON1-TGL-RHAMM<sup>B</sup> cell line. BON1-TGL cells overexpressing a control vector or *RHAMM<sup>B</sup>* were cultured in DMEM supplemented with 0.5 µg/ml puromycin, 10% FBS, 6 mM L-glutamine, and penicillin/streptomycin. N134 cells overexpressing cDNAs were generated as described [15]. N134 cells overexpressing shRNA and BON1-TGL overexpressing shRNA were cultured in medium supplemented with 0.4 µg/ml puromycin and 0.5 µg/ml puromycin, respectively.

For Western blot analysis, cell extracts were loaded into mini-protean 4-15% pre-cast gels (Bio-Rad). Protein was immobilized onto nitrocellulose membrane, 0.45 µm pore size (Bio-Rad). Blots were blocked for one hour with 3% (weight/volume) bovine serum albumin (Fisher Scientific) and incubated overnight at 4° C with a rabbit monoclonal antibody to RHAMM [EPR4055] antibody at 1:1,000 dilution (Abcam, ab108339). The next day blots were washed 4 times for 10 minutes with TBST and incubated for one hour at room temperature with an anti-rabbit secondary antibody at 1:5,000 dilution. Bands were detected with enhanced chemiluminescence.

### **Animal experiments**

Generation of *RIP-Tag*; *RIP-tva* mice has been described [1] and detailed protocols for somatic delivery of the RCASBP viruses has been described [15]. Immunodeficient mice, NOD/scid-IL2Rgc knockout (NSG), were generated by the Jackson Laboratory. This study was carried out in strict accordance with the recommendations in the Guide for the Care and Use of Laboratory Animals of the National Institutes of Health. All mice were housed in accordance with institutional guidelines. All procedures involving mice were approved by the Institutional



Animal Care and Use Committee of Weill Cornell Medicine. For the experimental metastasis assay, either  $1 \times 10^6$  N134 cells in 100  $\mu$ L PBS were injected into the tail veins of NSG mice or  $1 \times 10^6$  BON1-TGL cells in 100  $\mu$ L PBS were injected into the left ventricle of NSG mice. The orthotopic model of PanNET liver metastasis was performed as previously described [16] with the following modification:  $0.5 \times 10^6$  BON1-TGL cells in 50  $\mu$ L DMEM containing 2% FBS were injected into the spleen. A standard formula for tumor volume was applied (volume [ $\text{mm}^3$ ] =  $0.52 \times \text{width}^2 \times \text{length}$ ). Tumor burden is the sum of the tumor volume per mouse.

**Abbreviations:** RHAMM, receptor for hyaluronic acid-mediated motility; PNET, pancreatic neuroendocrine tumor; TCGA, The Cancer Genome Atlas (TCGA); HA, hyaluronic acid; FPKM, fragments per kilobase of transcripts per million reads; RT-qPCR, quantitative real-time reverse transcription PCR; PDAC, pancreatic ductal adenocarcinoma; DMEM, Dulbecco's modified Eagle's medium; FBS, fetal bovine serum.

## **Declarations**

### **Ethics approval and consent to participate**

All procedures involving mice were approved by the institutional animal care and use committee. Retrospective and prospective review of PNETs was performed using the pathology files and pancreatic cancer database at the authors' institutions with IRB approval.

### **Consent for publication**

All authors agreed on the manuscript.

### **Availability of data and material**

The RNA-Seq and TCGA datasets that support the findings of this study are available in Gene Expression Omnibus (GEO accession GSE50398, <http://www.ncbi.nlm.nih.gov/geo/query/acc.cgi?acc=GSE50398>) [9-11], and <http://cancergenome.nih.gov/cancersselected>, and the other data are available from the authors upon reasonable request.

### **Competing interests**

The authors declare no conflict of interest.

### **Funding**

This work is partially supported by NIH grants 2U01DK072473 (to Y.-C.N.D.), 1R21CA173348-01A1 (to Y.-C.N.D.), 1R01CA204916-01A1 (to Z.C., G.Z., Y.-C.N.D.), UL1TR000457 (to Z.C.), DOD grants W81XWH-13-1-0331 (to S.C., Z.C., Y.-C.N.D.) W81XWH-16-1-0619 (to Y.-C.N.D.), and Goldhirsh Foundation (to A.V., T.J. F.III, O.E., Y.-C.N.D.).

### **Authors' contributions**

S.C., X.C., B.J.K., G.Z., S.P., T.H., and L.S. performed the experiments and analyzed the data. D.W. conducted the analysis on the TCGA dataset. D.W., G.Z., S.P., T.J. F.III, and K.R. edited the manuscript. L.H.T. contributed immunohistochemical interpretation. A.V., C.S.C., and O.E. contributed to bioinformatics analyses. Z.C. performed statistical analysis. L.H.T., K.R., and T.J.

F.III contributed to samples. Y.-C.N.D. designed and performed the experiments, analyzed the data, and wrote the manuscript.

### **Acknowledgments**

The authors thank Danny Huang for mouse database design; Harold Varmus, Yi Li, Jihye Paik, Todd R. Evans, David Foster, Bi-Sen Ding, Katie Politi, Jeffrey Yongchun Zhao, Romel Somwar, Selina Chen-Kiang, Stephanie Azzopardi, Samantha Li, Megan Wong, Joseph Na, and Robin Zhang for their valuable input and excellent assistance; Diane L. Reidy and David S. Klimstra for contributing the approval of the tumor materials.

### **Authors' information**

Present address: <sup>a</sup>Samsung Bioepis, South Korea, <sup>b</sup>Herbert Wertheim College of Medicine, <sup>c</sup>Johns Hopkins University, <sup>d</sup>Temple University School of Medicine.

## References

1. Du YC, Lewis BC, Hanahan D, Varmus H: **Assessing tumor progression factors by somatic gene transfer into a mouse model: Bcl-xL promotes islet tumor cell invasion.** *PLoS biology* 2007, **5**:e276.
2. Du YC, Chou CK, Klimstra DS, Varmus H: **Receptor for hyaluronan-mediated motility isoform B promotes liver metastasis in a mouse model of multistep tumorigenesis and a tail vein assay for metastasis.** *Proceedings of the National Academy of Sciences of the United States of America* 2011, **108**:16753-16758.
3. Greiner J, Ringhoffer M, Taniguchi M, Schmitt A, Kirchner D, Krahn G, Heilmann V, Gschwend J, Bergmann L, Dohner H, Schmitt M: **Receptor for hyaluronan acid-mediated motility (RHAMM) is a new immunogenic leukemia-associated antigen in acute and chronic myeloid leukemia.** *Experimental hematology* 2002, **30**:1029-1035.
4. Chen YT, Chen Z, Du YN: **Immunohistochemical analysis of RHAMM expression in normal and neoplastic human tissues: a cell cycle protein with distinctive expression in mitotic cells and testicular germ cells.** *Oncotarget* 2018, **9**:20941-20952.
5. Sironen RK, Tammi M, Tammi R, Auvinen PK, Anttila M, Kosma VM: **Hyaluronan in human malignancies.** *Exp Cell Res* 2011, **317**:383-391.
6. Fraedrich K, Schrader J, Itrich H, Keller G, Gontarewicz A, Matzat V, Kromminga A, Pace A, Moll J, Blaker M, et al: **Targeting aurora kinases with danusertib (PHA-739358) inhibits growth of liver metastases from gastroenteropancreatic neuroendocrine tumors in an orthotopic xenograft model.** *Clinical cancer research : an official journal of the American Association for Cancer Research* 2012, **18**:4621-4632.

7. Cheng XB, Sato N, Kohi S, Koga A, Hirata K: **Receptor for Hyaluronic Acid-Mediated Motility is Associated with Poor Survival in Pancreatic Ductal Adenocarcinoma.** *J Cancer* 2015, **6**:1093-1098.
8. Evers BM, Townsend CM, Jr., Upp JR, Allen E, Hurlbut SC, Kim SW, Rajaraman S, Singh P, Reubi JC, Thompson JC: **Establishment and characterization of a human carcinoid in nude mice and effect of various agents on tumor growth.** *Gastroenterology* 1991, **101**:303-311.
9. Zhou Y, Park SY, Su J, Bailey K, Ottosson-Laakso E, Shcherbina L, Oskolkov N, Zhang E, Thevenin T, Fadista J, et al: **TCF7L2 is a master regulator of insulin production and processing.** *Hum Mol Genet* 2014, **23**:6419-6431.
10. Fadista J, Vikman P, Laakso EO, Mollet IG, Esguerra JL, Taneera J, Storm P, Osmark P, Ladenvall C, Prasad RB, et al: **Global genomic and transcriptomic analysis of human pancreatic islets reveals novel genes influencing glucose metabolism.** *Proc Natl Acad Sci U S A* 2014, **111**:13924-13929.
11. Taneera J, Fadista J, Ahlqvist E, Atac D, Ottosson-Laakso E, Wollheim CB, Groop L: **Identification of novel genes for glucose metabolism based upon expression pattern in human islets and effect on insulin secretion and glycemia.** *Hum Mol Genet* 2015, **24**:1945-1955.
12. Tang LH, Contractor T, Clausen R, Klimstra DS, Du YC, Allen PJ, Brennan MF, Levine AJ, Harris CR: **Attenuation of the retinoblastoma pathway in pancreatic neuroendocrine tumors due to increased cdk4/cdk6.** *Clinical cancer research : an official journal of the American Association for Cancer Research* 2012, **18**:4612-4620.

13. Holland EC, Hively WP, DePinho RA, Varmus HE: **A constitutively active epidermal growth factor receptor cooperates with disruption of G1 cell-cycle arrest pathways to induce glioma-like lesions in mice.** *Genes Dev* 1998, **12**:3675-3685.
14. Choi S, Chen Z, Tang LH, Fang Y, Shin SJ, Panarelli NC, Chen YT, Li Y, Jiang X, Du YC: **Bcl-xL promotes metastasis independent of its anti-apoptotic activity.** *Nat Commun* 2016, **7**:10384.
15. Zhang G, Chi Y, Du YN: **Identification and Characterization of Metastatic Factors by Gene Transfer into the Novel RIP-Tag; RIP-tva Murine Model.** *J Vis Exp* 2017.
16. Zhang G, Du YN: **Orthotopic Pancreatic Tumor Mouse Models of Liver Metastasis.** *Methods Mol Biol* 2019, **1882**:309-320.

**Table S1.** Impact of genes on lymph node and liver metastasis of PanNETs in *RIP-Tag*; *RIP-tva* mice.

| <b>RCASBP-</b>           | <b>Age (week)</b> | <b>Lymph node metastasis</b> | <b>Liver metastasis</b> |
|--------------------------|-------------------|------------------------------|-------------------------|
| <i>RHAMM<sup>A</sup></i> | 16                | 0/8 mice (0%)                | 0/8 mice (0%)           |
| <i>RHAMM<sup>B</sup></i> | 16                | 8/11 mice (73%)              | 8/11 mice (73%)         |
| <i>EGFR*</i>             | 16                | 5/8 mice (62.5%)             | 2/8 mice (25%)          |

## Figure Legends:

**Fig. 1.** RHAMM<sup>B</sup>, but not RHAMM<sup>A</sup>, is upregulated in human PNETs and promotes liver metastasis of mouse PNET cells. (A) Diagram of RHAMM<sup>A</sup> and RHAMM<sup>B</sup> proteins. (B) RHAMM is upregulated in 54 of 83 cases (65%) of human PNETs in immunohistochemical staining. Left: Normal pancreas with islets in dashed circle. Middle: RHAMM negative PNET. Right: RHAMM positive PNET. Original magnification: 20X. Scale bar, 50  $\mu$ m. (C) RNA-seq analysis showed that *RHAMM<sup>B</sup>* is significantly upregulated compared to *RHAMM<sup>A</sup>* in primary human PNETs and liver metastases. The p value was calculated using two-way ANOVA followed by Tukey's test. \*\*:  $p < 0.0001$ , \*:  $p < 0.05$ . Error bars represent standard error of mean. (D) Western blot analysis of human RHAMM in mouse N134 cell line (control), N134-RHAMM<sup>A</sup> cells, and N134-RHAMM<sup>B</sup> cells. (E) A total of 1 million N134 cells, N134-RHAMM<sup>A</sup> cells, or N134-RHAMM<sup>B</sup> cells were injected into the tail vein of NSG mice (n = 5 for each group). Five weeks later, the recipient mice were euthanized to survey for metastatic sites and incidence. Representative liver photos were shown.

**Fig. S1.** RT-qPCR analysis of *RHAMM<sup>A</sup>* (A) and *RHAMM<sup>B</sup>* (B) in 9 primary human PNETs and 3 metastatic PNETs from the livers.

**Fig. S2.** Unlike RHAMM<sup>B</sup>, RHAMM<sup>A</sup> did not promote liver metastasis of mouse PNET N134 cell line in a tail vein experimental metastasis assay. (A) The number of liver macrometastases was recorded. (B) Immunohistochemical staining of synaptophysin in the liver sections to reveal the presence of metastatic PNETs. Arrows indicate micrometastases. Original magnification: 10X. Scale bar, 200  $\mu$ m.



**Fig. 2.** RHAMM<sup>B</sup> is crucial for metastatic potential of human PNET cell line, BON1-TGL. (A) *RHAMM<sup>A</sup>* and *RHAMM<sup>B</sup>* expression in BON1 cell line compared to those in normal islets. (B) *RHAMM<sup>A</sup>* and *RHAMM<sup>B</sup>* knockdown in BON1-TGL cell line by *shRHAMM* as determined by RT-qPCR analysis. (C) Western blot analysis of RHAMM and tubulin (as a loading control) in BON1-TGL-*shLacZ* cell line and BON1-TGL-*shRHAMM* cell line. (D-F) RHAMM knockdown greatly inhibited liver metastasis of BON1-TGL cells. A total of 0.5 million each BON1-TGL-*shLacZ* (control) or BON1-TGL-*shRHAMM* were injected into the spleen of NSG mice (n = 4 for each group). After 3 weeks, the recipient mice were euthanized to survey for metastatic sites and incidence. The number of liver macrometastases (D) and the tumor burden of liver macrometastases (E) were recorded. \*: statistically significantly different (p < 0.05, one-tailed Mann-Whitney U test). Error bars in this figure represent standard deviation. (F) Liver sections with hematoxylin and eosin stain. Dashed circles indicate metastases. Original magnification: 10X. Scale bar, 1 mm. (G) RHAMM<sup>B</sup> overexpression in BON1-TGL-RHAMM<sup>B</sup> cell line. Western blot analysis of RHAMM and tubulin (as a loading control) are shown. (H) Representative bioluminescent images of NSG mice 4 weeks after injection (upper panel) and their organs (lower panel). A total of 1 million cells was injected into NSG mice via intracardiac injection (n = 7). (I) The tumor burden of macrometastases at adrenal glands was documented. \*: statistically significantly different, p<0.05, t-test.

**Fig. 3.** *RHAMM<sup>B</sup>* is upregulated in human pancreatic ductal adenocarcinoma (PDAC) and correlates with poor survival. (A) *RHAMM<sup>A</sup>* and *RHAMM<sup>B</sup>* expression values from TCGA PDAC dataset. *RHAMM<sup>A</sup>*: uc003lzf or NM\_012484. *RHAMM<sup>B</sup>*: uc003lzg or NM\_012485. cancer

(ca): n = 124; control (ctrl): n = 4. Bars and error bars represent means and standard errors. (B-D) Kaplan-Meier survival analysis of TCGA cohort with 93 PDAC cases. High and low represent the status of the *RHAMM* mRNA expression levels compared to average values. (E) Knockdown efficiency of two EGFR shRNAs. S7 and S9 reduced EGFR protein expression and p-Erk1/2 levels in N134 cells overexpressing *RHAMM<sup>B</sup>* by Western blot analysis.  $\alpha$ -tubulin was used a loading control. (F) EGFR knockdown greatly inhibited the liver metastasis of N134 cells overexpressing *RHAMM<sup>B</sup>*. A total of 1 million N134\_ *RHAMM<sup>B</sup>\_shLacZ*, N134\_ *RHAMM<sup>B</sup>\_shEGFR(S7)*, or N134\_ *RHAMM<sup>B</sup>\_shEGFR(S9)* cells were injected into the tail vein of NSG mice (n = 5 for each group). At the indicated time points, the recipient mice were euthanized to survey for metastatic sites and incidence. The number of liver macrometastases was recorded. (G) Western blot analysis of p-Erk1/2 and total Erk from N134 overexpressing luciferase (control), and N134\_ *EGFR\**. (H) N134 cells overexpressing luciferase (Luc), N134\_ *EGFR\** (*EGFR\**), N134\_ *RHAMM<sup>B</sup>* (*RHAMM<sup>B</sup>*) were injected into the tail vein of NSG mice (n = 5, each group). Five weeks later (for Luc and *EGFR\** groups) or when mice were lethargic (for *RHAMM<sup>B</sup>*), mice were euthanized to survey for metastatic sites and incidence. \*: p < 0.0001, One-way ANOVA and pairwise comparison with Tukey's adjustment.

**Fig. S3.** Correlation between *EGFR* expression and *RHAMM<sup>A</sup>* (A) or *RHAMM<sup>B</sup>* (B) expression in TCGA PDAC dataset (RNA-Seq V2).

Figure 1

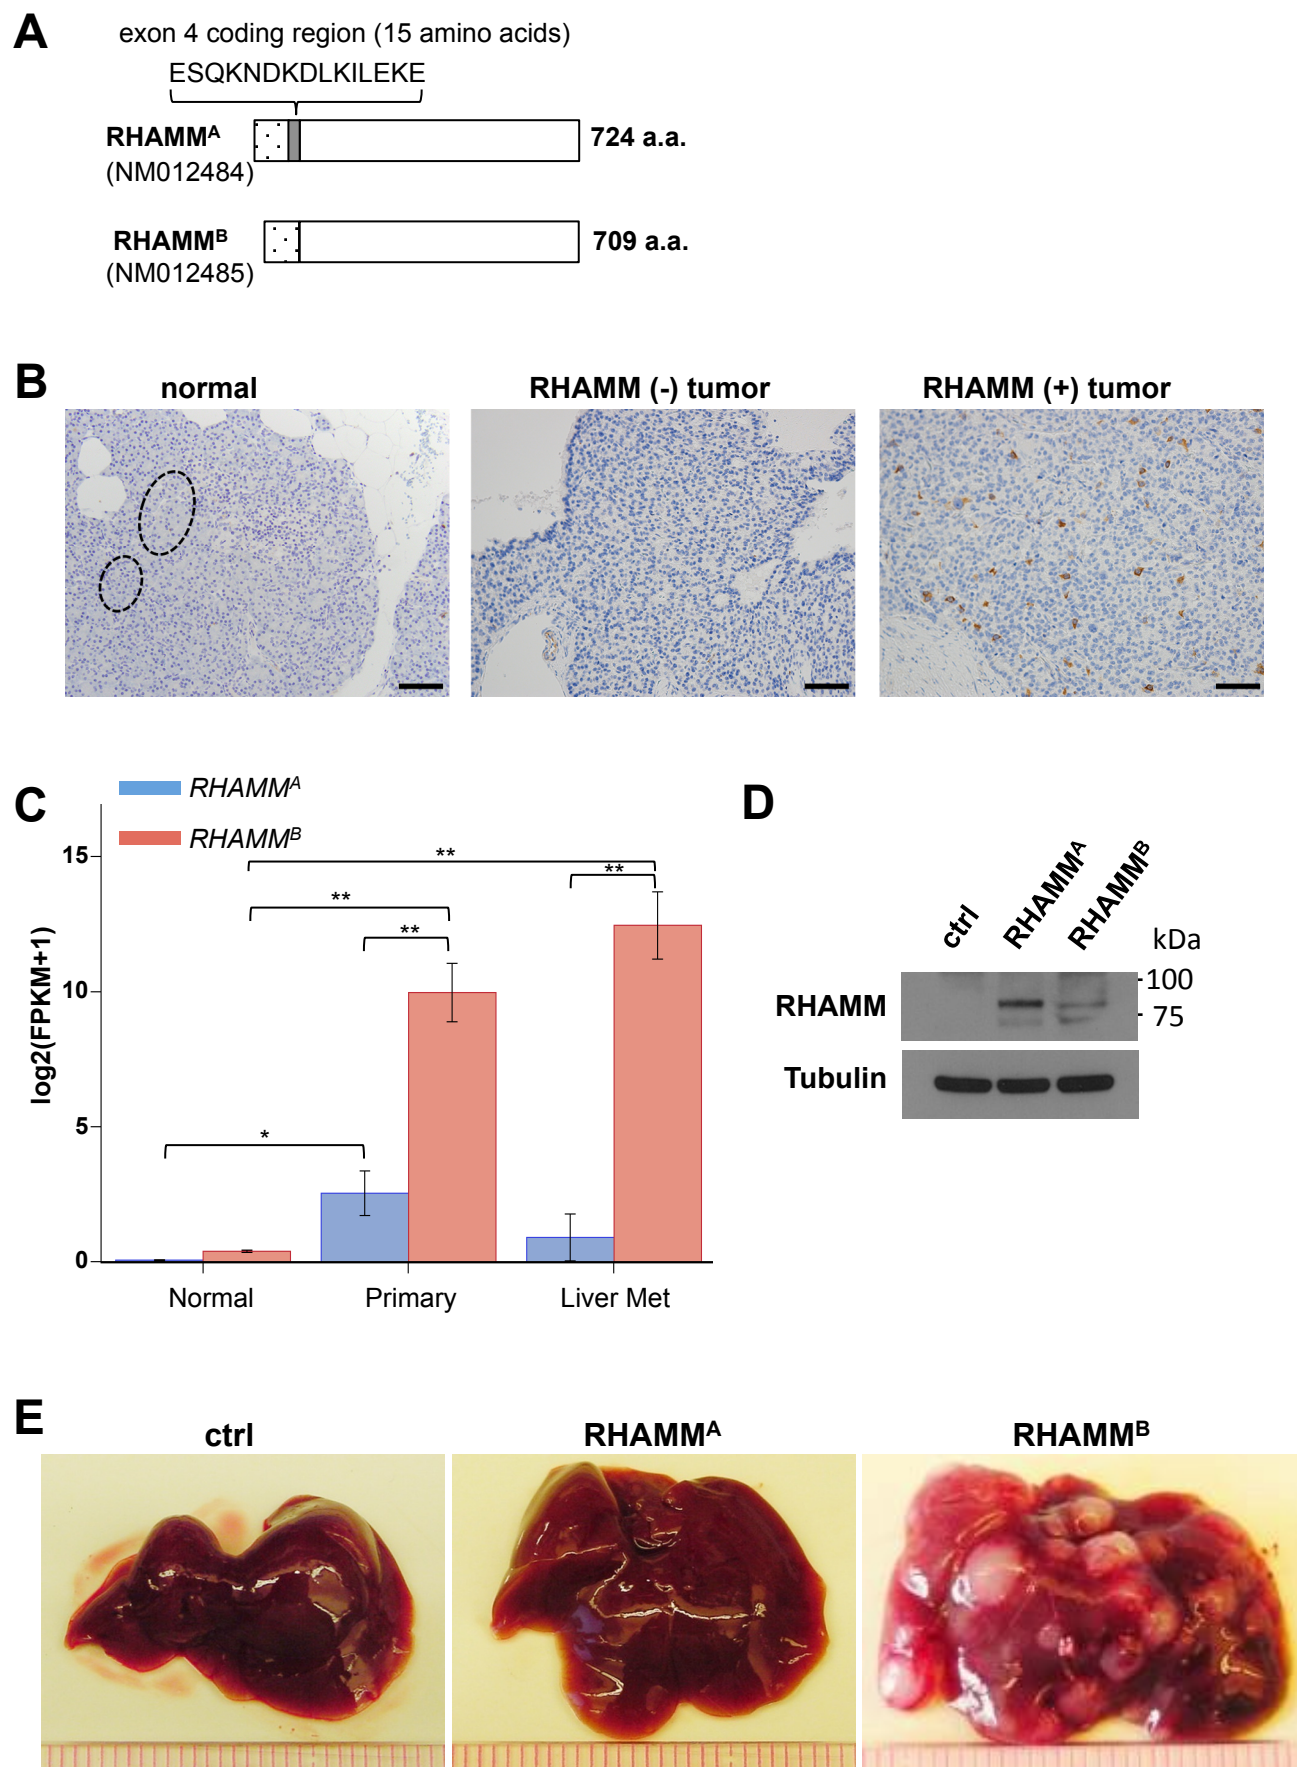

## Additional file: Figure S1

**A**

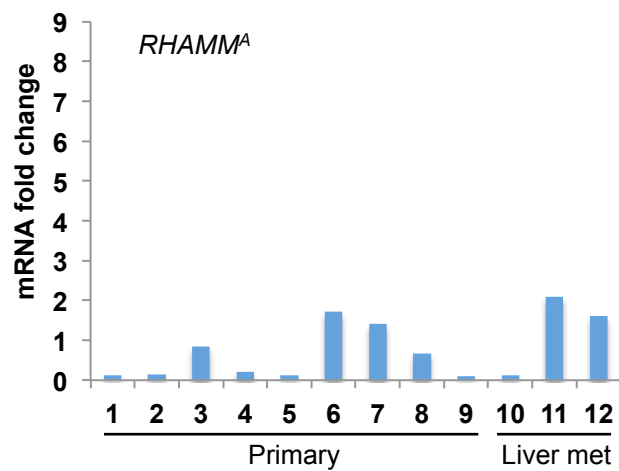

**B**

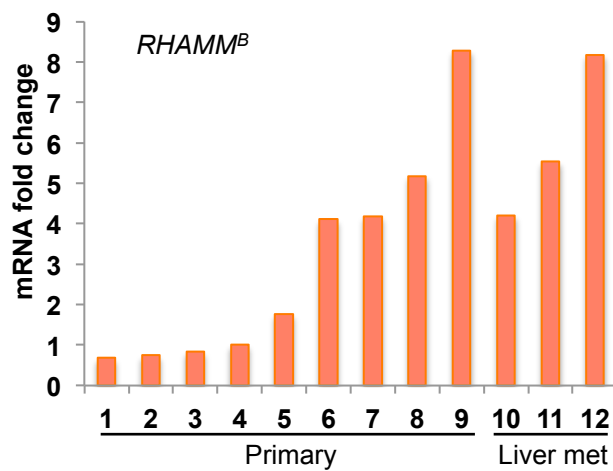

**Additional file: Figure S2**

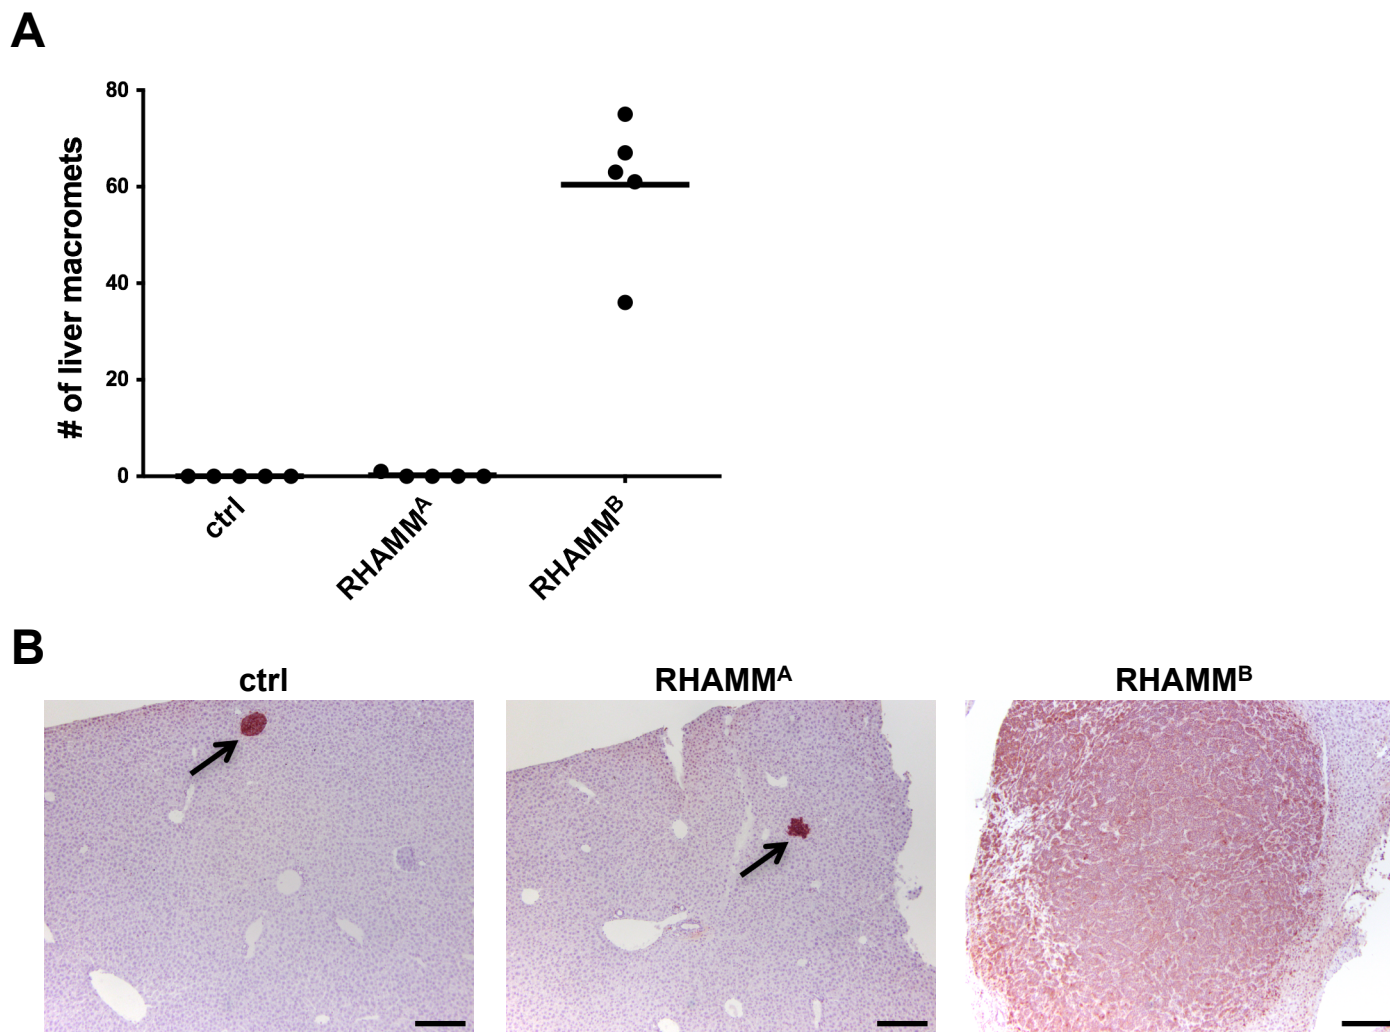



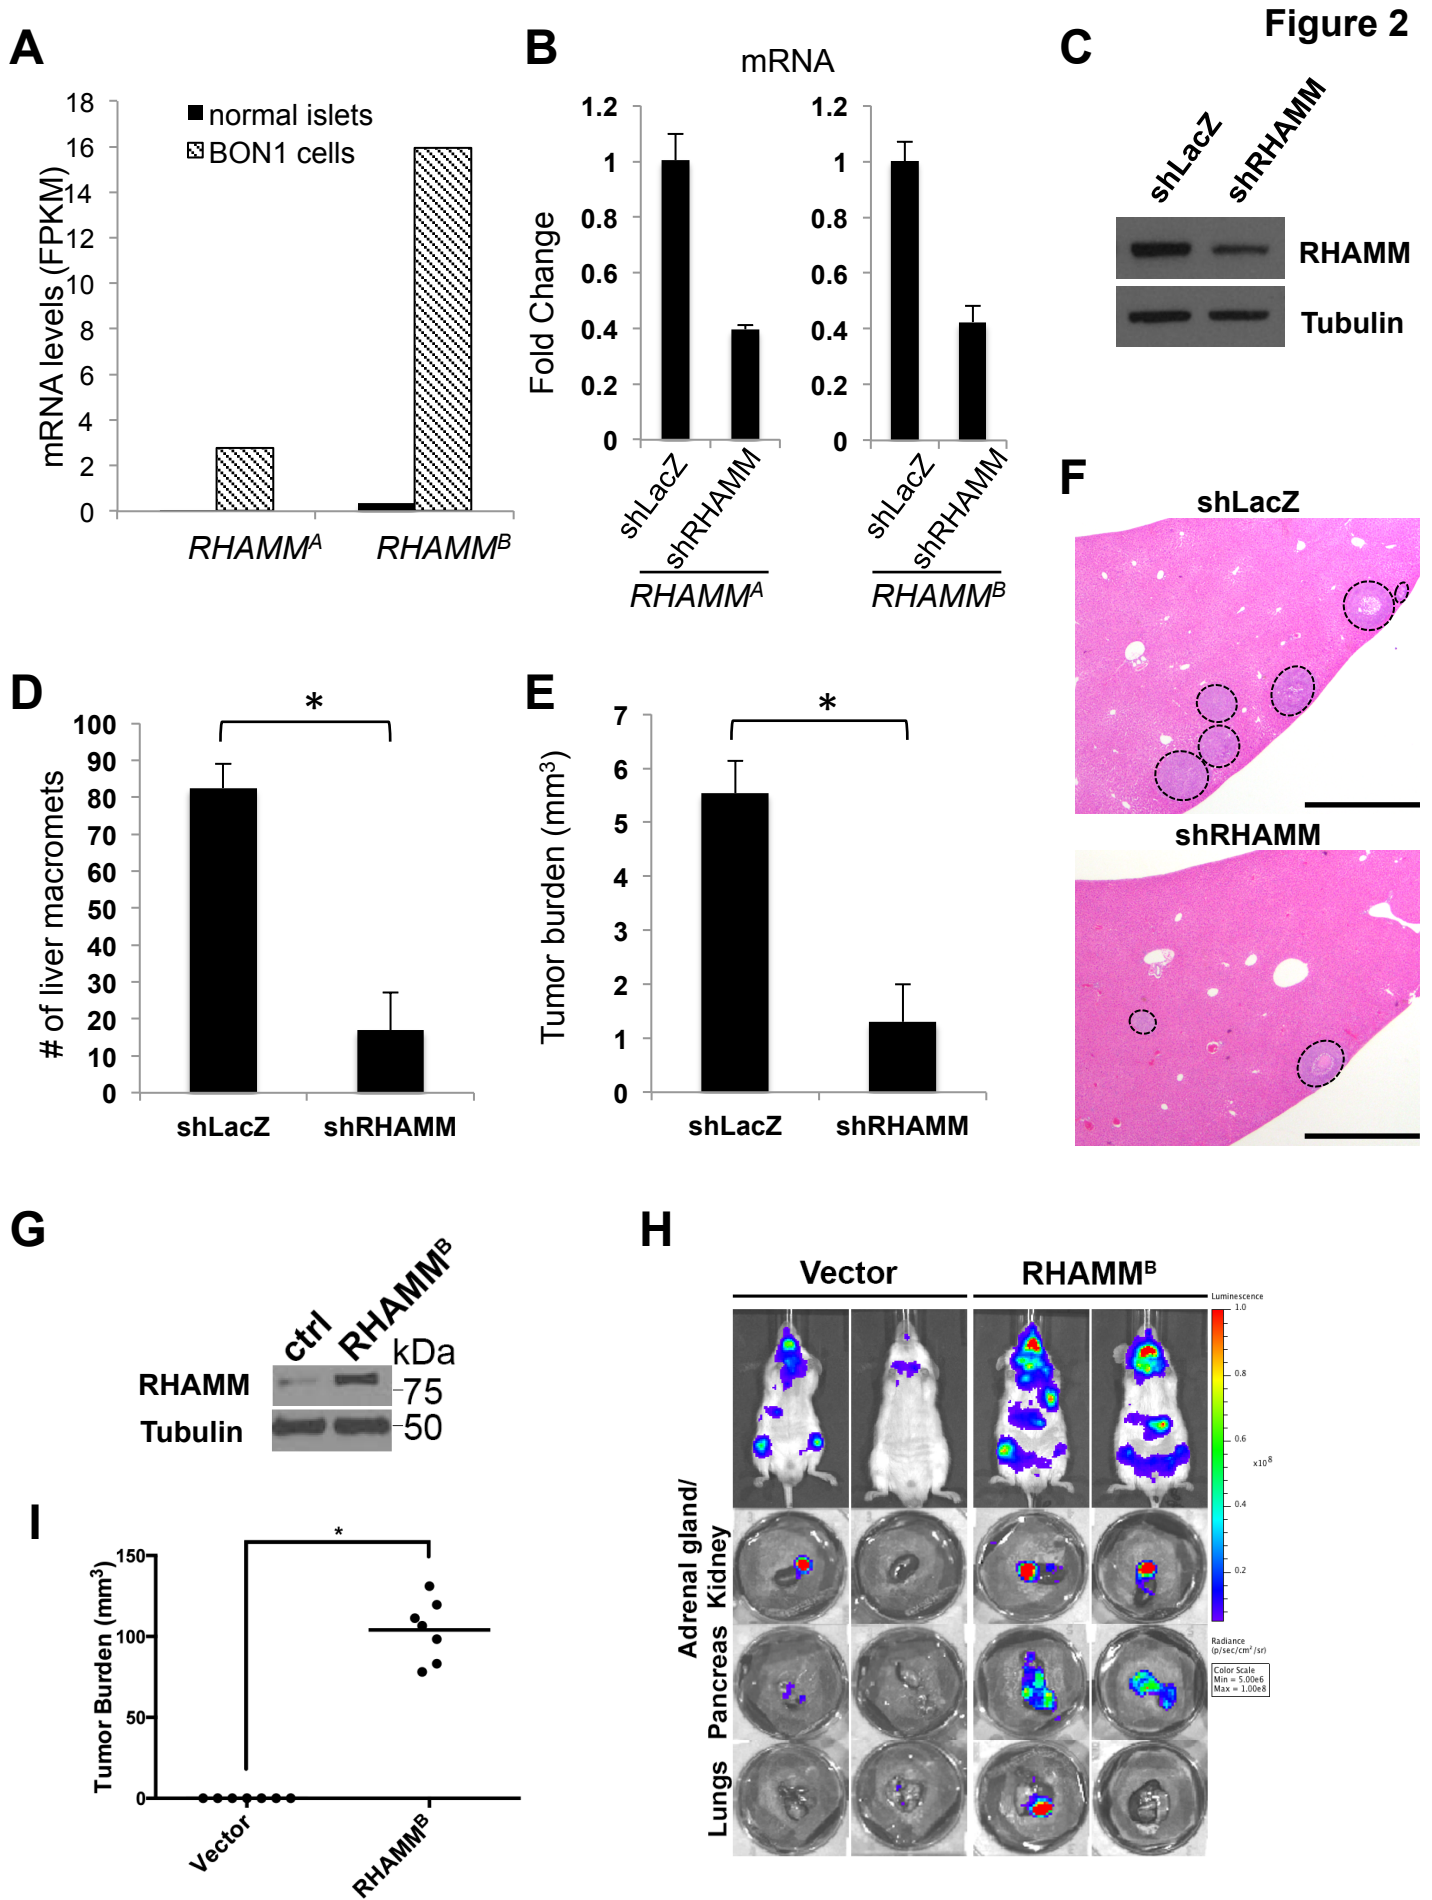

Figure 3

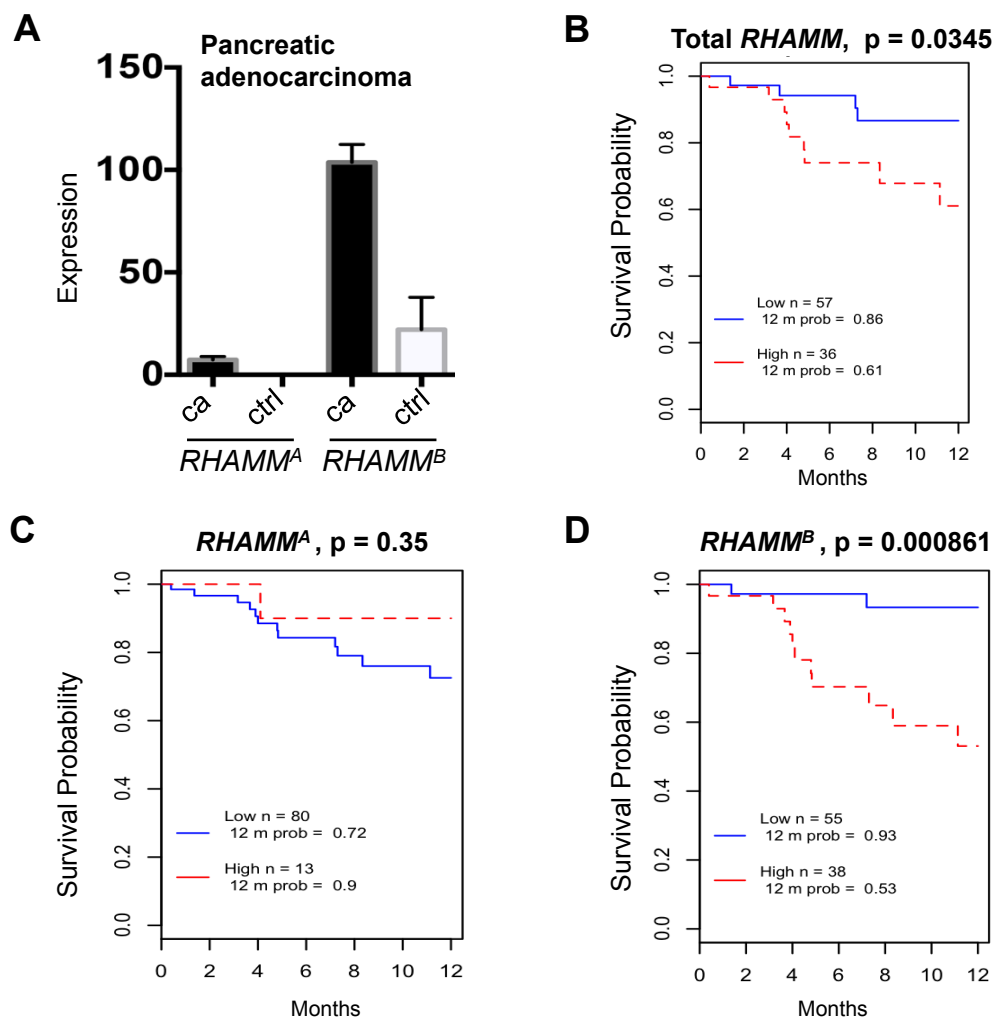





## Additional file: Figure S3

**A**

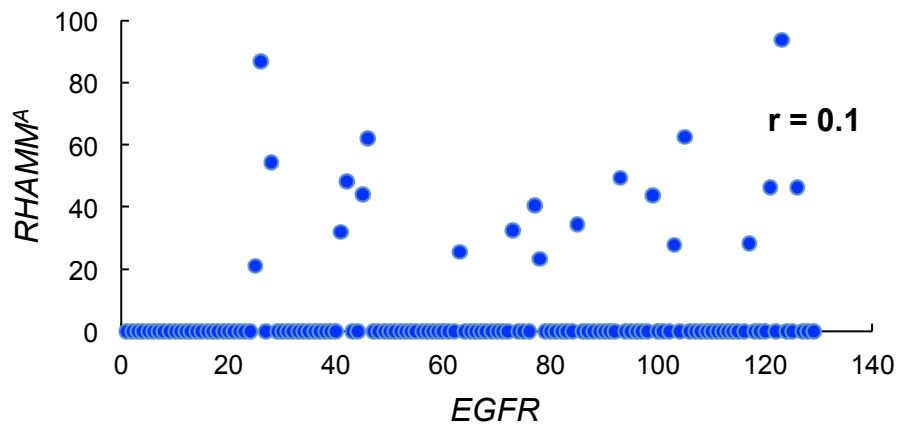

**B**

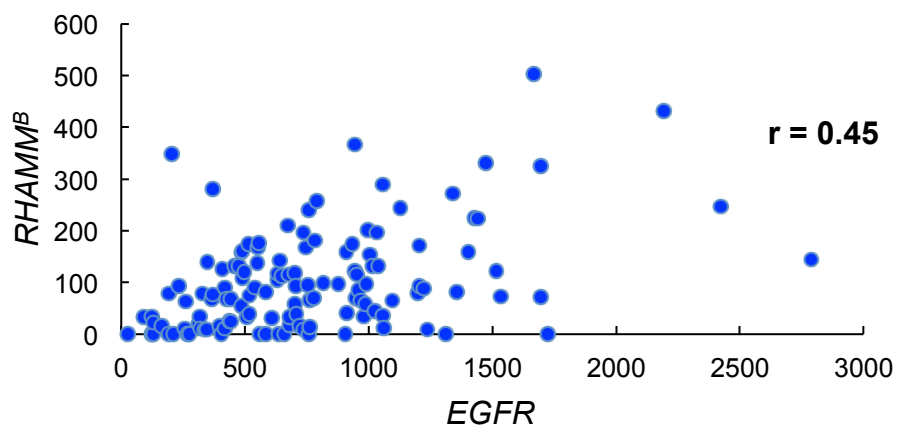

Source: http://biorxiv.org/content/10.1101/598334v1.full.pdf
